# Supplementary material for: New solutions for old challenges in glaucoma treatment: is taurine an option to consider?
Source: PubMed Central journal article supplement — Neural Regen Res. 2020 Nov 16;16(5):967–71. doi: 10.4103/1673-5374.297059 (PMC8178787; doi:10.4103/1673-5374.297059), 2020-11-16
Supplement: NRR-16-967_Suppl1.pdf [file NRR-16-967_Suppl1.pdf]

## OPEN PEER REVIEW REPORT 1

**Name of journal:** Neural Regeneration Research

**Manuscript NO:** NRR-D-20-00279

**Title:** New solutions for old challenges in glaucoma treatment: is taurine an option to consider?

**Reviewer's Name:** Vittorio Porciatti

**Reviewer's country:** USA

### COMMENTS TO AUTHORS

Neuroprotection in glaucoma is an area of active investigation, so far without a solution. The authors present a comprehensive, well written review on actions of taurine, a non-protein amino acid abundant in the visual system. They present a compelling argument that TAU might be a useful in glaucoma neuroprotection, in particular if new formulations will be developed to deliver the molecule non-invasively, as opposed to intravitreal injections. My only comment is that there is a little discrepancy between the title "New solutions..." and the conclusions where the reader realizes that the TAU solution is still premature. Perhaps the authors may amend the title. The authors can add a brief paragraph to introduce the criteria for references, such as year range and exclusion/inclusion criterion.
